# Supplementary material for: Kin discrimination in social yeast is mediated by cell surface receptors of the Flo11 adhesin family
Source: eLife. 2020 Apr 14;9:e55587. doi: 10.7554/eLife.55587 (PMC7156268; doi:10.7554/eLife.55587)
Supplement: Figure 2—source data 1. [file elife-55587-fig2-data1.xlsx]

## Sheet: Tabelle1
	Single cell-cell adhesion forces determined by SCFS and presented in Figure 2D, Figure 2-figure supplement 1F, Figure 2-figure supplement 2C,G and Figure 2-figure supplement 3
	Genotype			∆A vs ∆A							ScFlo11A vs ∆A							ScFlo11A vs ScFlo11A					ScFlo11A+ vs ScFlo11A-			ScFlo11A+ vs ScFlo11A+			∆A vs Covalent			ScFlo11A vs Covalent			ScSFlo11A vs Covalent			∆A vs ConA			ScFlo11A vs ConA			ScSFlo11A vs ConA
	Contact time	0.5s	1s	5s	10s	20s			0.5s	1s	5s	10s	20s			0.5s	1s	5s	10s	20s			20s			20s			20s			20s			20s			20s			20s			20s
	Forces (nN)	0.296627	1.50542	1.04637	4.61808	5.41316			0.194025	0.490297	0.894987	0.659524	5.42498			0.382959	2.30594	0.621476	1.0529	10.922			0.447011			14.1206			0.364334			0.00811583			0.121512			6.86879			6.92106			8.46496
		0.0491613	1.15879	0.417474	4.68245	1.55982			0.258394	0.336152	0.835669	0.626427	2.51456			0.498578	2.44429	5.42924	2.87412	17.2454			2.2456			13.9087			0.0811351			0.329316			0.0672463			7.31655			6.39952			6.36353
		0.831821	1.16761	2.0931	0.986724	1.86136			0.302493	0.486633	0.579396	1.00791	4.24914			0.47809	8.47701	2.26466	9.04749	19.3491			2.09327			14.0953			0.0912264			0.239495			0.0153879			7.68824			9.59417			8.75597
		0.890349	0.967412	2.15651	0.589874	1.49022			0.514772	0.492062	0.863556	1.22478	1.30665			0.486647	7.62847	9.75487	11.8715	17.8897			2.37168			14.5571			0.0577817			0.0286453			0.0459262			7.07311			5.88034			2.92718
		0.33271	2.36894	0.125366	0.939816	1.18501			0.554764	0.300726	0.0985992	0.815346	1.0993			0.490777	8.49345	3.3055	4.0026	15.7721			2.32386			15.2196			0.0944774			0.199616			0.24			7.07381			5.14758			3.38262
		0.522325	0.801831	9.66006	1.02805	2.11036			0.41282	0.517165	0.115492	4.745	1.36061			0.511118	2.92735	2.87164	3.43886	20.9288			1.82963			15.3632			0.210001			0.226445			0.43798			7.53215			5.48815			9.4161
		0.303002	0.783266	1.31366	5.48284	1.0891			0.417253	0.339734	0.53627	0.886445	0.915023			0.525129	9.06487	3.44074	6.52021	22.6296			1.73656			15.7854			0.631886			0.164388			0.0756367			6.11621			6.97224			9.34425
		0.797231	0.952054	1.23965	0.83367	0.955882			0.330411	0.483859	0.794016	0.963019	1.13854			0.528882	8.11841	1.12743	3.72666	16.7519			1.65725			15.9747			0.041256			0.518303			0.254223			8.12702			7.26155			8.98477
		1.18928	0.952205	1.01655	0.785525	0.679475			0.362572	0.469032	0.824705	1.17627	0.811522			0.543304	1.30519	5.39675	4.76258	21.661			1.31956			16.2956			0.141097			0.0535206			0.0660999			8.22684			9.41397			7.77724
		1.60801	1.03418	1.0088	0.909307	0.569616			0.30732	0.478834	0.714207	0.929262	0.974814			0.563551	8.39023	2.09744	11.2439	11.0442			1.14947			16.9073			0.0629985			0.389067			0.0566165			7.40813			7.48259			7.40779
		1.35716	0.596006	1.04637	0.709861	0.910987			0.299417	0.341531	0.55338	1.07482	1.165			0.572176	1.63077	15.0922	13.0184	10.9755			0.928086			17.2904			0.0983326			0.234892			0.333032
		1.72248	0.936247	0.417474	0.587373	11.1635			0.570326	0.458352	0.453923	1.05842	0.819377			0.592934	1.12845	2.85173	12.1135	11.1251						17.1933			0.632672			0.0631798			0.180197
		0.30531	1.05655	2.0931	0.76232	3.49244			0.287734	0.272075	0.824242	2.80612	4.7726			0.603966	1.91363	2.81858	10.9787	14.8755						17.539			0.235788			0.0911726			0.112911
		0.327855	1.19449	2.15651	1.03455	5.70724			0.462622	0.429291	0.791231	0.959489	0.959976			0.99277	1.83063	3.22356	8.61046	25.7163						18.1976			0.549346			0.188918			0.0524975
		0.675611	0.592795	0.125366	1.35581	3.8419			0.505578	0.385231	0.665882	1.12912	1.00245			2.40597	1.95642	2.97864	0.66184	12.3316						18.6271			0.232052			0.430687			0.0352579
		0.921957	4.46425	9.66006	1.79541	2.94865			0.367386	0.323793	0.483763	0.899934	0.607887			0.144605	2.24605	3.07998	3.16436	26.203						18.876			0.506823			0.359503			0.0382901
		1.75695	0.668087	2.92839	1.15279	4.34793			0.290427	0.364563	0.519544	1.05884	1.46876			0.248732	1.99602	3.24277	9.99704	16.191									0.370833			0.491461			0.0616645
		0.746486	1.11196	3.09904	10.5673	5.70923			0.259385		0.628567	0.85025	0.632863			1.98103	2.06747	3.29592	6.37142	16.1047									0.149522			0.272662			0.0333654
		0.824256	1.27561	2.10338	11.6639	4.96085			0.278246		0.447625		5.44773			1.97551	2.53136	3.44909	8.77058	13.7275
		0.399772	3.37517	1.09713	5.9752	1.40571							1.77384			1.37374	2.49235	3.43662	8.91316	8.57762
		0.3053	3.8232	1.82843	3.71285	0.296627										2.28502	2.53254	3.76901	10.0526	4.94963
		0.692678	3.82568	1.0918	0.79029	0.0491613										0.249389	2.51804	3.9341	10.0212	6.43372
		0.667394	1.87707	1.73351	1.11147	0.303002										0.703637	2.67724	3.21868	16.1125	6.88806
		0.68953	0.80343		0.910226	7.2154										0.272909	2.4737	3.7694	10.2939	9.04001
		0.44305	3.98748		1.08371	0.152049										0.230722	2.7222	4.0477	10.364	7.61209
																0.263768	2.88243	3.78169	10.5064	8.00531
																0.162726	0.282421	4.26327	10.4704	7.8199
																0.162704	0.240542	3.66503	19.6248	8.54678
																0.166744	0.466155	3.08324	10.9709	8.44221
																0.184707	0.241656	4.19854	10.4727	8.83397
																0.130918	0.200727	4.169	12.7012	8.62665
