# Supplementary material for: Kin discrimination in social yeast is mediated by cell surface receptors of the Flo11 adhesin family
Source: eLife. 2020 Apr 14;9:e55587. doi: 10.7554/eLife.55587 (PMC7156268; doi:10.7554/eLife.55587)
Supplement: Figure 3—source data 1. [file elife-55587-fig3-data1.xlsx]

## Sheet: Tabelle1
	Single cell-cell adhesion forces determined by SCFS and presented in Figure 3B and Figure 2-figure supplement 3
	Genotype		W51D Y182D vs W51D Y182D						Y111D Y113D Y118D vs Y111D Y113D Y118D							Y133D W144D Y196D vs Y133D W144D Y196D							Y111D Y113D Y118D vs Y133D W144D Y196D							Y111A Y113A Y118A vs Y111A Y113A Y118A							Y133A W144A Y196A vs Y133A W144A Y196A							Y111A Y113A Y118A vs Y133A W144A Y196A
	Contact time	0.5s	1s	5s	10s	20s			0.5s	1s	5s	10s	20s			0.5s	1s	5s	10s	20s			0.5s	1s	5s	10s	20s			0.5s	1s	5s	10s	20s			0.5s	1s	5s	10s	20s			0.5s	1s	5s	10s	20s
	Forces (nN)	2.84695	3.36431	5.11316	15.4093	10.406			0.61808	1.4886	1.81445	3.58228	4.216			0.75	0.165172	0.68095	0.677571	1.61095			0.44	0.924769	0.673582	0.593948	0.456416			0.91538	4.216		3.36431	5.41316			1.77689	1.17501	2.10671	2.55859	1.50453			0.2	0.3065	0.858143	0.665643	1.48153
		2.57395	9.36427	5.9553	5.77993	20.9334			0.682448	1.21706	1.39114	5.50635	4.37832			0.57	0.302655	0.328281	1.58088	0.900277			0.65	0.160177	0.648605	0.607732	0.175754			1.14276	1.37832	9.96383	4.07722	1.55982			1.39203	1.06831	0.480648	2.68201	9.03067			0.44	0.28131	0.745249	0.679241	1.68085
		1.96066	1.02523	3.84785	6.47588	11.1516			0.56796	1.23103	3.50176	6.13001	4.52372			0.1	0.338302	0.29801	1.26569	0.914845			0.6	0.492803	0.459149	0.757074	2.41926			0.63096	1.52372	1.36427	3.67519	1.86136			1.4075	1.02599	2.09795	2.38647	4.49034			0.08	0.0168412	0.554459	0.76512	1.20916
		2.57864	2.97244	1.49022	6.69925	11.9751			0.589874	1.33886	0.973321	6.33061	4.47009			0.85	0.383698	0.401424	1.0718	1.34245			0.65	0.369789	1.69717	0.595741	1.61052			0.129749	1.47009	8.02523	5.82239	1.49022			1.47586	1.04629	2.10963	2.82955	3.68258			0.24	0.354171	0.520101	0.679534	1.50649
		2.78913	3.16866	7.11206	7.58683	12.1009			0.939816	0.986724	2.27814	6.23097	4.44742			0.75	0.174644	0.543348	0.978372	1.01835			0.65	0.309507	0.546758	0.718824	0.455306			1.03246	1.44742	2.97244	1.37849	1.18501			1.34604	1.34488	2.88901	5.04075	9.11899			0.29	0.361816	0.403275	0.635476	1.07458
		3.01845	7.63696	3.49244	7.93329	12.4752			1.02805	0.83367	0.1951	6.02251	3.84981			0.5	0.195598	0.299807	0.975211	1.46761			0.73	0.32619	0.658316	0.608224	0.801699			1.25377	3.84981	3.16866	5.37994	9.11036			1.49888	1.17201	1.76441	2.53606	8.88825			0.41	0.244695	0.584368	4.10265	0.324647
		2.79172	3.43399	5.70724	8.15996	12.9382			0.482838	0.928568	0.688143	6.27513	4.1162			0.4	0.187786	0.845812	0.452063	0.31133			0.46	0.207099	0.630096	0.575291	1.29711			0.884239	4.1162	9.63696	3.27759	3.0891			1.4542	1.03674	1.43888	2.16257	3.67559			0.14	0.108806	0.740099	6.90066	1.66798
		3.2519	4.35824	3.8419	8.77407	13.2457			0.989777	1.19493	7.47453	5.90761	3.84311			0.66	0.205107	0.572304	0.650536	1.30045			0.69	0.271733	0.76774	0.63455	0.854224			1.30016	1.84311	3.43399	2.95572	3.95588			1.16226	1.16118	3.32601	11.1034	11.2056			0.22	0.351415	0.651586	1.20113	1.42426
		2.87512	4.07722	7.54865	9.27447	14.1206			0.785525	1.26485	1.56147	5.99543	3.82744			0.55	0.215697	0.429254	0.61778	1.78098			0.79	0.333722	0.831871	0.736053	1.06768			0.888777	1.82744	4.35824	6.18002	5.67948			1.56071	1.16879	1.53311	2.1912	13.852			0.18	0.312414	0.368353	0.816596	1.50209
		2.90233	3.67519	4.34793	10.1494	13.9087			0.909307	1.06573	8.04075	5.81309	4.13846			0.88	0.353941	0.504923	0.18088	1.25833			0.84	0.411484	0.741883	0.706993	0.996461			1.13671	1.13846	6.54162	7.26051	7.56962			1.46161	0.920696	1.28421	12.543	4.05178			0.23	0.266499	0.596556	0.14465	0.519207
		2.31452	6.82239	5.70923	10.3198	14.0953			0.709861	1.01452	6.74559	2.46634	3.95499			0.61	0.599566	0.543674	0.625645	0.684123			0.49	0.410307	0.749643	0.606266	0.730275			1.12157	3.95499	1.81332	1.42565	4.91099			1.42218	1.19937	2.58949	2.22951	3.89255			0.69	0.408756	0.708003	0.363343	1.68215
		2.68855	7.37849	4.96085	10.406	24.5571			0.587373	1.26362	3.91674	2.04289	8.18335			0.82	0.35904	0.610595	0.67461	0.80629			0.58	0.178783	0.467535	0.384064	1.01673			0.967512	1.18335	9.34617	1.4328	10.1635			1.26958	0.93893	1.96428	3.18075	4.13229			0.54	0.187525	0.674333	4.50232	1.56891
		2.77545	1.37994	8.21314	10.9334	15.2196			0.76232	1.21868	3.72107	2.19466	4.23508			0.71	0.258395	0.494916	0.81435	0.41012			0.06	0.270482	0.994843	0.712136	0.564723			0.7357	4.23508	7.11118	2.83251	3.49244			1.43647	1.04405	2.87851	3.16773	3.67234			0.41	0.247831	0.640933	0.0130703	0.525835
		3.11789	3.27759	7.19705	7.54864	15.3632			1.03455	0.992431	2.99722	2.3712	2.35649			0.75	0.318061	1.02247	0.724765	0.732076			0.41	0.46922	0.68505	0.719544	0.749992			0.755419	1.35649	1.39833	5.81309	5.70724			1.24857	0.951847	2.50168	2.79356	3.03505			0.03	0.203886	0.777538	1.77689	1.94111
		2.34261	2.95572	4.19705	6.87309	25.7854			1.35581	1.01333	2.0756	1.06075	4.53912			0.72	0.648086	0.892704	0.550005	0.535378			0.53	0.377116	0.623466	0.826383	0.8331			0.913056	2.53912	5.4249	1.06075	3.8419			1.34956	0.984536	2.22145	2.96436	3.25099			0.25	0.285922	0.77569	1.39203	1.37177
		1.47281	3.18002	7.71285	13.406	15.9747			1.49541	6.41899	1.24201	0.911167	4.22417			0.55	0.193354	0.612678	0.608038	0.647078			0.84	0.271312	0.554885	0.612993	0.489472			0.649777	0.22417	6.00546	17.5025	5.54865			1.31756	1.30794	2.80554	2.13765	7.24996			0.54	0.285778	0.398519	1.4075	1.78185
		2.26315	2.26051	5.40571	1.44855	16.2956			1.15279	5.90569	1.01492	3.68011	0.38117			0.44	0.19577	1.01139	0.55958	0.678218			0.48	0.260674	0.732992	0.527926	1.20818			0.650479	4.38117	5.07682	8.63592	4.34793			1.33622	1.14417	2.16958	2.99093	8.86099			0.79	0.308635	0.19394	1.47586	1.25423
		2.68967	6.42565	5.44705	5.39747	16.9073			0.877699	5.94102	0.524856	3.37072	4.26831			0.65	0.270275	0.966125	0.741562	1.11076			0.81	0.216981	0.75607	0.555351	1.10908			0.858489	1.26831	5.96728	7.31644	5.70923			0.702713	1.33293	1.22348	2.74568	4.07966			0.07	0.390042	0.474532	1.34604	0.854624
		2.51233	5.4328	4.46478		7.72904			1.02083	6.17129	3.21032	3.4207	4.28869																	0.800549	4.27518	3.45108	5.83237	4.96085			0.867353	1.06855	1.50318	7.335	3.54381
		2.8707	2.83251	4.61131		2.1933			1.49101	5.99543	3.07342	3.0377	4.09604																	0.742561	0.98869	7.17818	7.77086	11.5673
		1.25267	8.81309						0.887475	5.81309	1.18697	3.19065	3.36873																	0.496295	4.09604	7.07971	6.70684	6.1639
									1.34719		1.90931	2.96873	0.20957																	0.895706	1.34719		4.11767	11.7752
									1.11147			2.96873	3.79029
									0.910226			3.21314	7.00524
									2.88371			3.19705	3.10716
									1.32806			2.48486	10.0714
									1.01902			3.20548	7.30349
									1.03424			3.29179	4.2295
												3.11206	5.24543
												2.84785
												0.2553
