# Supplementary material for: Kin discrimination in social yeast is mediated by cell surface receptors of the Flo11 adhesin family
Source: eLife. 2020 Apr 14;9:e55587. doi: 10.7554/eLife.55587 (PMC7156268; doi:10.7554/eLife.55587)
Supplement: Figure 4—source data 1. [file elife-55587-fig4-data1.xlsx]

## Sheet: Tabelle1
	Single cell-cell adhesion forces determined by SCFS and presented in Figure 4C and Figure 2-figure supplement 3
	Genotype			KpFlo11A vs ∆A						KpFlo11A vs KpFlo11A							KpFlo11A vs ScFlo11A							KpFlo11A vs ClFlo11A							ClFlo11A vs ∆A							ClFlo11A vs ClFlo11A							ClFlo11A vs ScFlo11A
	Contact time	0.5s	1s	5s	10s	20s			0.5s	1s	5s	10s	20s			0.5s	1s	5s	10s	20s			0.5s	1s	5s	10s	20s			0.5s	1s	5s	10s	20s			0.5s	1s	5s	10s	20s			0.5s	1s	5s	10s	20s
	Forces (nN)	0.470051	0.790158	0.859836	0.697642	3.0436			0.91038	1.86102	0.455491	4.94554	8.62541			0.49845	0.481328	1.85053	1.10933	0.444444			0.128991	0.867353	0.95936	0.749776	0.994097			0.339705	0.126207	0.499895	0.830161	1.77634			0.696505	0.566248	0.815926	1.44464	13.7694			2.01503	0.121154	1.449	16.5169	6.47159
		0.551375	0.458324	0.262857	0.551645	3.01006			0.955271	0.774626	1.87043	8.99978	5.77878			0.406116	0.795051	1.89928	1.27873	1.01014			0.0954939	0.550367	0.811443	0.638777	0.326346			0.224924	0.0302962	0.793987	1.18099	0.991862			0.538361	0.260993	0.810117	8.66278	23.6931			1.14392	3.15652	1.04671	1.82294	5.54223
		0.56407	0.747743	0.515749	0.953769	1.24774			0.507989	0.455465	1.57086	10.9869	7.08151			0.530557	0.46315	1.51349	0.889368	0.175761			0.72144	0.62016	0.696983	0.569582	1.16359			0.422991	0.0358626	0.463089	1.0594	1.22175			0.374082	1.08964	0.784719	11.1733	3.11452			0.716957	2.82062	1.35012	2.12678	5.92774
		0.690804	0.357401	0.640056	0.722272	0.821786			0.794872	0.627027	1.27837	5.00099	7.76167			0.308123	0.682172	1.2513	1.08584	0.951247			0.546512	0.642125	0.585063	0.854149	1.05865			0.240399	0.0764844	0.620628	0.778525	1.40143			0.511744	0.511976	0.929064	1.16493	4.39724			0.805714	2.48356	1.02053	12.8295	6.34472
		0.323661	0.255203	0.673875	0.661097	1.12033			0.794872	0.59442	1.31578	4.86866	8.20279			0.87573	0.651355	1.36994	1.02687	1.73299			0.616382	0.557061	0.580156	0.804263	1.12318			0.291432	0.109065	0.654128	1.09177	1.68372			0.453026	0.677309	1.18406	12.1339	7.69377			1.17818	2.27854	1.00833	9.51497	6.97813
		0.154653	0.545205	0.489291	0.941462	0.927227			1.95107	0.628198	1.47842	8.91936	4.2426			0.681082	0.658728	1.43167	0.973397	1.63387			0.971956	0.769015	0.568592	0.784892	0.57483			0.26286	0.026874	0.589559	1.07313	1.52197			0.523869	0.236512	1.12973	5.39529	8.97646			1.39268	2.63549	1.44837	2.24736	7.22644
		0.450797	0.569289	0.813974	0.805842	1.20094			1.28618	0.788952	0.388565	4.95357	12.3804			0.397064	0.806439	1.43747	1.0104	2.77426			0.685022	0.697242	0.654346	0.408865	1.82639			0.274889	0.0391482	0.370937	1.02868	1.59456			0.57712	0.48457	1.15589	18.0113	5.76354			0.898406	2.39652	1.05061	2.01358	13.7135
		0.655699	0.377098	0.642027	0.990741	0.930644			1.66004	0.784194	1.20599	5.11558	4.46806			0.690419	0.822297	1.19511	0.939226	3.01582			0.778565	0.629778	0.653142	0.587237	1.33676			0.281581	0.02634	0.608078	0.950702	1.4684			0.37365	0.700883	1.1519	9.21198	2.35448			1.07093	2.39755	1.58354	2.09286	1.52233
		0.502301	0.385401	0.665799	0.884803	1.21286			1.13608	0.628782	1.35275	5.18348	15.4634			0.710497	0.673268	1.3422	1.12157	2.9498			0.866219	0.895549	0.636453	0.876331	1.53046			0.262752	0.257675	0.386091	0.921327	0.904318			0.400609	0.462563	1.1719	12.213	8.75884			1.59325	2.90924	3.09905	1.96653	7.08638
		0.546476	0.835803	0.55368	0.768208	1.05353			1.8306	0.669319	1.18551	1.09879	4.52273			0.666347	0.663271	1.14768	1.09071	5.93383			0.797418	0.697618	0.524052	0.700045	1.28487			0.35151	0.279359	0.0671575	1.06416	2.33108			0.45407	0.405744	0.82071	1.40952	3.43301			1.58794	2.63325	3.31037	1.68571	1.16904
		0.508098	0.356857	0.572907	0.770819	0.996186			1.11651	1.50363	1.0123	1.21448	4.67074			0.573106	0.427103	0.999028	0.755819	6.06269			1.01306	0.627022	0.474637	0.693778	1.38164			0.261219	0.402627	0.030392	0.98217	1.4713			0.354111	0.75	0.856821	6.47276	12.3268			1.49177	2.01909	3.49527	5.62315	2.59409
		0.521254	0.730722	0.540516	0.925566	0.934737			1.5067	0.617378	1.15932	3.83724	12.6138			0.300624	0.66362	1.17866	0.881901	6.34703			0.713857	0.733392	0.558584	0.834034	1.4036			0.227743	0.397179	0.104942	3.25355	3.278			0.535493	0.54663	1.73821	15.4171	14.2262			1.37601	2.13142	2.43098	6.9282	0.858548
		0.459547	0.363848	0.705146	0.501214	0.942404			1.21232	0.726283	0.765486	1.07249	6.62715			0.561806	0.696504	0.711203	0.931889	5.43213			0.880393	0.69458	0.514898	0.716299	1.11011			0.228995	0.554273	0.0307303	3.29186	3.85806			0.566578	0.739462	0.917828	1.23735	9.23935			1.42142	2.2887	3.12968	6.83809	11.3827
		0.812753	0.405023	0.732328	0.671376	0.797267			1.14856	0.614094	1.18167	1.00943	14.6445			0.42994	0.641707	1.14524	1.69682	5.51463			0.680492	0.757899	0.469321	0.677077	0.815644			0.287139	0.337822	0.0144836	4.63284	3.6095			0.329322	0.635444	0.824927	4.33936	11.8485			1.71833	1.8197	2.45354	6.50543	4.61813
		0.634599	0.477817	0.798961	0.839734	1.28763			1.21636	0.804926	1.21339	11.0004	14.7614			0.40312	0.759118	1.19612	0.991647	6.0364			0.719255	0.883383	0.945675	0.531932	0.769229			0.402968	0.267711	0.0580731	3.40288	2.77877			0.795719	0.409545	1.73375	13.1885	9.36143			1.19112	1.84839	2.55598	6.50028	2.35579
		1.06111	0.154146	0.637294	0.817774	0.848272			1.57344	0.911182	1.12982	2.9827	15/07/201615/07/201615/07/201615/07/201615/07/201615/07/2016			0.602259	0.928763	1.12274	1.68117	5.05063			0.79094	0.729152	0.936651	0.690196	0.73883			0.330093	0.362623	0.158283	3.33247	2.37817			0.271376	0.506656	0.728568	1.10341	6.04817			1.08393	1.78453	2.45084	3.32182	7.11534
		0.951206	0.43991	0.768068	0.769444	1.39602			1.06777	0.74022	1.02316	7.94112	4.71979			0.463581	0.918285	0.959952	1.65044	5.42823			0.874642	0.806967	0.364508	0.638016	0.699149			0.374047	0.341195	0.0932244	4.19234	2.04823			0.708836	0.580481	1.79157	1.41946	12.0738			1.50052	2.46356	1.93846	3.12008	1.92844
		0.384127	1.07276	0.669197	0.802473	1.3314			0.568485	1.74179	1.35423	1.20397	14.7953			0.283831	1.06608	1.35958	0.940027	5.39937			0.730572	0.969488	1.20811	0.768581	0.964211			0.291978	0.38004	3.03018	4.04683	2.49857			0.488563	1.3819	2.80883	6.83411	13.0035			0.903174	2.08145	1.99596	2.84603	2.22599
		0.529987	0.561321	0.663949	0.673874	0.965236				1.76254	1.49104	9.08748	4.87037			0.427544	4.51279	1.44353	0.849917	4.68686																	0.371047	5.47023	1.07419	7.85058	11.0858			1.18996	1.82958	2.2537	2.82757	11.9209
			1.20575	0.756897	0.507576	0.89907					0.898317	5.72306	7.83105			0.329614	3.88874	3.53472	4.93887	4.75036
