# Supplementary material for: Kin discrimination in social yeast is mediated by cell surface receptors of the Flo11 adhesin family
Source: eLife. 2020 Apr 14;9:e55587. doi: 10.7554/eLife.55587 (PMC7156268; doi:10.7554/eLife.55587)
Supplement: Figure 5—source data 1. [file elife-55587-fig5-data1.xlsx]

## Sheet: Tabelle1
Quantification of RFP and GFP signals in mixed biofilms presented in Figure 5
Numbers in area rows correspond to pixels (px)
scale = 2540px/8.8cm
RFP Strain in biofilm	GFP Strain in biofilm	Replicate	totalArea	totalAreaRed	totalAreaGreen	erodedArea20px	erodedArea20pxRed	erodedArea20pxGreen	circularArea	circularAreaRed	circularAreaGreen	erodedLine50pxAbundanceRed	maxRadius (px)
ScFlo11A	ScFlo11A	01.1	1652703	1362427	290276	1559357	1296012	263345	1572533	1303106	269427	0.784355	708
ScFlo11A	ScFlo11A	01.2	1611986	1247431	364555	1519267	1189157	330110	1519641	1185778	333863	0.750591	696
ScFlo11A	ScFlo11A	01.3	2222823	1686176	536647	2111632	1612587	499045	2094371	1595859	498512	0.761178	817
deltaA	ScFlo11A	02.1	2251998	561425	1690547	2134614	559722	1574866	1454810	558937	895847	0.0275454	681
deltaA	ScFlo11A	02.2	2204557	642468	1562089	2082783	629101	1453682	1412343	618828	793515	0.132045	671
deltaA	ScFlo11A	02.3	2442843	663061	1779782	2315711	652679	1663032	1630826	638828	991998	0.0922108	721
ScSigmaFlo11A	ScFlo11A	03.1	2792763	2750465	38650	2652941	2619729	33212	2013135	1980173	32962	0.999471	801
ScSigmaFlo11A	ScFlo11A	03.2	2730741	2622082	108658	2587302	2481496	105806	1968122	1863308	104814	0.99715	792
ScSigmaFlo11A	ScFlo11A	03.3	2891325	2812152	77365	2738841	2667795	71044	2028248	1957770	70478	0.999468	804
KpFlo11A	ScFlo11A	04.1	1616270	1503707	112563	1523656	1436825	86831	1510915	1421545	89370	0.947176	694
KpFlo11A	ScFlo11A	04.2	1548074	1454560	93348	1457802	1380802	76834	1395560	1320538	74856	0.961674	667
KpFlo11A	ScFlo11A	04.3	1537678	1435339	102256	1446784	1353710	92991	1395557	1304098	91376	0.977291	667
ClFlo11A	ScFlo11A	05.1	2624751	2561125	56363	2496753	2437962	56255	2018184	1959866	56166	0.999433	802
ClFlo11A	ScFlo11A	05.2	1470198	1348978	121164	1372430	1265574	106800	1084353	977887	106411	1	588
ClFlo11A	ScFlo11A	05.3	2245142	2197862	47280	2125958	2078679	47279	1778937	1731670	47267	1	753
ScFlo11A	deltaA	06.1	1422034	1073714	348243	1330451	996875	333499	910970	588125	322768	0.915858	539
ScFlo11A	deltaA	06.3	2385573	2150409	235002	2263982	2031203	232618	1731991	1500904	230933	0.997775	743
deltaA	deltaA	07.1	997919	727463	270456	925975	690135	235840	934830	697553	237277	0.648565	546
deltaA	deltaA	07.1	1604667	1120417	484250	1511832	1057186	454646	1412373	987554	424819	0.696594	671
deltaA	deltaA	07.2	990165	744338	245827	918578	704987	213591	907650	700325	207325	0.686531	538
ScSigmaFlo11A	deltaA	08.1	2469166	2367970	98856	2339776	2252811	86965	1649007	1563040	85967	0.999625	725
ScSigmaFlo11A	deltaA	08.2	2893746	2851932	41814	2727454	2686472	40982	1554827	1513845	40982	1	704
KpFlo11A	deltaA	09.1	2015553	1912171	103057	1909411	1813602	95484	1760093	1664733	95035	0.998385	749
KpFlo11A	deltaA	09.2	2069464	1812078	257386	1959397	1705420	253977	1635387	1382631	252756	0.997973	722
KpFlo11A	deltaA	09.3	1510285	1348753	161532	1419045	1269669	149376	1144192	995676	148516	1	604
ClFlo11A	deltaA	10.1	3172282	3093855	78427	3027215	2948788	78427	2299280	2220853	78427	1	856
ClFlo11A	deltaA	10.2	3343083	3233863	109211	3189732	3080521	109211	2089298	1980087	109211	1	816
ClFlo11A	deltaA	10.3	3265615	3191217	72004	3120820	3046422	72004	2166838	2092440	72004	1	831
ScFlo11A	ScSigmaFlo11A	11.1	2414435	358155	2055989	2292724	356707	1935726	1928512	355532	1572689	0.00335504	784
ScFlo11A	ScSigmaFlo11A	11.2	3118701	404110	2714589	2962776	391819	2570957	2358809	391368	1967441	0.000945477	867
deltaA	ScSigmaFlo11A	12.1	2363280	335111	2028036	2238787	334626	1904028	1826567	334626	1491808	0	763
deltaA	ScSigmaFlo11A	12.2	3132642	280573	2846409	2977590	269423	2702511	2424519	269745	2149118	0.00291356	879
ScSigmaFlo11A	ScSigmaFlo11A	13.1	3292730	1628455	1663713	3141544	1592663	1548319	2172102	1305126	866428	0.259059	832
ScSigmaFlo11A	ScSigmaFlo11A	13.2	3033284	1603115	1430169	2872982	1548534	1324448	2208822	1353737	855085	0.34088	839
KpFlo11A	ScSigmaFlo11A	14.1	3108564	619118	2489446	2966411	616374	2350037	2408029	613607	1794422	0.0209566	876
KpFlo11A	ScSigmaFlo11A	14.2	3259522	502047	2757475	3112927	501931	2610996	2326236	501931	1824305	0	861
KpFlo11A	ScSigmaFlo11A	14.3	3207301	440562	2766393	3061694	440561	2620787	2310057	440561	1869150	0	858
ClFlo11A	ScSigmaFlo11A	15.1	3243746	990823	2252923	3100033	978363	2121670	2496861	918408	1578453	0.0895448	892
ClFlo11A	ScSigmaFlo11A	15.2	2794375	459553	2334393	2659650	458905	2200316	2172085	458905	1712751	0	832
ClFlo11A	ScSigmaFlo11A	15.3	3135325	716091	2419234	2989795	712808	2276987	2424552	711700	1712852	0.0114847	879
ScFlo11A	KpFlo11A	16.1	2119109	735664	1383445	2009856	726650	1283206	1958174	720289	1237885	0.143988	790
ScFlo11A	KpFlo11A	16.2	2351785	939899	1411886	2237562	926972	1310590	2114965	918063	1196902	0.119727	821
ScFlo11A	KpFlo11A	16.3	2005928	886209	1119719	1895554	861849	1033705	1836153	855479	980674	0.250639	765
deltaA	KpFlo11A	17.1	2225917	676322	1549517	2112383	674648	1437657	1685641	673437	1012126	0.00695029	733
deltaA	KpFlo11A	17.2	1897943	588954	1308989	1791697	586400	1205297	1429256	587422	841834	0.0351035	675
deltaA	KpFlo11A	17.3	1798551	563249	1235302	1697594	562275	1135319	1383023	560973	822050	0.0107092	664
ScSigmaFlo11A	KpFlo11A	18.1	3422345	3413963	8382	3284727	3276345	8382	2627353	2618971	8382	1	915
ScSigmaFlo11A	KpFlo11A	18.2	3562015	3519986	41586	3432457	3390440	41586	2796641	2754624	41586	1	944
ScSigmaFlo11A	KpFlo11A	18.3	3264768	3222661	42107	3120498	3078391	42107	2326235	2284128	42107	1	861
KpFlo11A	KpFlo11A	19.1	2013702	1606655	407047	1902724	1545830	356894	1630885	1307504	323381	0.8521	721
KpFlo11A	KpFlo11A	19.2	1941962	1590361	350891	1836860	1507874	328276	1764792	1444102	319980	0.792887	750
KpFlo11A	KpFlo11A	19.3	2311799	1868675	442868	2191332	1774632	416444	1826562	1540434	285872	0.756083	763
KpFlo11A	KpFlo11A	19.4	2163597	1693837	469760	2053610	1609881	443729	1978107	1551054	427053	0.735171	794
ClFlo11A	KpFlo11A	20.1	2986466	2851016	135086	2836187	2700737	135086	1506562	1371112	135086	1	693
ClFlo11A	KpFlo11A	20.2	3066192	2942626	123566	2922267	2798701	123566	2208804	2085238	123566	1	839
ClFlo11A	KpFlo11A	20.3	3232439	3122633	109806	3088967	2979161	109806	2452227	2342421	109806	1	884
ScFlo11A	ClFlo11A	21.1	3129968	542003	2587843	2991115	541997	2448996	2430075	541997	1887956	0	880
ScFlo11A	ClFlo11A	21.2	3284693	462716	2820703	3143696	462716	2679706	2496839	462653	2032926	0	892
ScFlo11A	ClFlo11A	21.3	3426714	653923	2772791	3277524	639977	2637547	2424586	639468	1785118	0.00177591	879
deltaA	ClFlo11A	22.1	3152558	443284	2709268	3009524	443282	2566236	1918719	443282	1475431	0	782
deltaA	ClFlo11A	22.2	2848672	383327	2465113	2712430	383319	2328879	2079065	383319	1695514	0	814
deltaA	ClFlo11A	22.3	3028250	423174	2605076	2885157	423174	2461983	2151238	423174	1728064	0	828
ScSigmaFlo11A	ClFlo11A	23.1	2639111	1593360	1045604	2483072	1499513	983412	1296842	788994	507701	0.595397	643
ScSigmaFlo11A	ClFlo11A	23.2	3069901	2755036	314865	2921120	2626149	294971	2320796	2105569	215227	0.87791	860
ScSigmaFlo11A	ClFlo11A	23.3	2501602	2422773	74621	2369667	2292514	74580	1953200	1876182	74561	0.999453	789
KpFlo11A	ClFlo11A	24.1	2805065	756784	2047617	2654342	751531	1902147	1194050	732541	460913	0.0535572	617
KpFlo11A	ClFlo11A	24.2	2551520	941773	1609681	2389856	912963	1476827	1229120	833682	395387	0.177091	626
KpFlo11A	ClFlo11A	24.3	2957414	1076056	1881358	2798853	1059058	1739795	1541609	1015987	525622	0.106893	701
ClFlo11A	ClFlo11A	25.1	3205796	2619262	586534	3059110	2500462	558648	2342477	1915966	426511	0.804631	864
ClFlo11A	ClFlo11A	25.2	3176671	2616341	560330	3030282	2503928	526354	2375109	1990507	384602	0.77849	870
ClFlo11A	ClFlo11A	25.3	3451143	2816888	634255	3316693	2703791	612902	2946811	2378834	567977	0.855786	969
ClFlo11A	ClFlo11A	25.4	3368306	3014398	352407	3222632	2880051	341099	2685136	2377591	306122	0.906179	925
