# Supplementary material for: Kin discrimination in social yeast is mediated by cell surface receptors of the Flo11 adhesin family
Source: eLife. 2020 Apr 14;9:e55587. doi: 10.7554/eLife.55587 (PMC7156268; doi:10.7554/eLife.55587)
Supplement: Figure 6—source data 1. [file elife-55587-fig6-data1.xlsx]

## Sheet: Tabelle1
	Single cell-cell adhesion forces determined by SCFS and presented in Figure 6B and Figure 2-figure supplement 3
	Genotype			ScSFlo11A vs ∆A						ScSFlo11A vs ScSFlo11A							ScSFlo11A vs ScFlo11A							ScSFlo11A vs KpFlo11A							ScSFlo11A vs ScFlo11ASins							ScFlo11ASins vs ScFlo11ASins							ScFlo11ASins vs ScFlo11A
	Contact time	0.5s	1s	5s	10s	20s			0.5s	1s	5s	10s	20s			0.5s	1s	5s	10s	20s			0.5s	1s	5s	10s	20s			0.5s	1s	5s	10s	20s			0.5s	1s	5s	10s	20s			0.5s	1s	5s	10s	20s
	Forces (nN)	0.86942	0.436641	0.885993	1.40889	1.47093			4.83376	2.94187	20.039	18.3136	8.20317			0.545352	0.530859	0.621122	1.08582	0.642151			0.596049	0.549963	0.63604	0.60831	1.95302			2.6397	2.7101	4.83372	4.86867	9.97376			4.31724	2.84374	2.0669	3.41144	18.9873			0.453884	0.880735	1.11318	1.74558	3.72336
		0.768597	0.832316	0.591161	1.18445	1.99899			3.19985	0.725622	5.28875	15.5292	28.726			0.678869	0.620423	0.667339	0.94717	1.28449			0.408464	0.135611	0.540078	0.449294	0.116734			1.69031	2.29204	4.59462	7.96775	7.66623			3.16716	2.90289	1.98949	3.36682	9.34835			0.803809	0.657501	0.989854	1.14992	4.43251
		0.591041	0.68614	0.425767	1.68622	1.80564			2.90355	6.56696	16.6784	13.1505	26.8838			0.523977	1.02157	1.18789	0.970457	1.1096			0.53382	0.368393	0.522279	0.544248	2.03592			1.63088	2.28258	4.29795	0.135436	7.36606			3.40859	3.31032	1.68162	3.74722	4.19204			0.390464	1.0283	0.806025	1.12975	2.99914
		0.290925	0.49404	0.615336	1.44366	2.18021			7.4927	7.55802	17.5688	8.58838	9.52634			0.663686	0.970017	0.667867	1.06867	3.84104			0.490833	1.18254	0.384739	0.738695	3.09592			2.04768	2.20996	4.48669	5.70456	8.10369			3.52261	2.32971	1.77498	3.77393	6.27098			0.648555	0.858515	1.6979	0.984585	4.18875
		0.703587	0.593381	0.523282	1.68752	1.60066			4.94218	22.6558	22.6154	29.6015	30.1243			0.620431	0.419041	1.16315	1.14594	1.00558			0.59831	0.198837	0.831508	0.537213	0.434889			1.78639	2.53213	3.95718	6.10275	8.11991			3.25768	2.6837	1.71967	3.56402	7.78552			0.456979	1.03593	1.17281	1.20776	3.34379
		0.421254	0.506092	0.505745	1.01919	1.36049			3.28676	21.902	21.6973	22.3047	17.6406			0.481296	0.960962	1.11376	0.937937	3.72457			0.397016	2.23788	1.40469	0.693987	4.1289			2.03671	2.65928	3.95174	5.75313	7.09867			2.83493	2.24679	2.46548	3.4504	7.98059			0.566368	0.7315	0.680811	0.950097	3.59051
		0.336014	0.365898	0.664125	1.68009	1.52709			3.12858	22.587	22.5927	22.134	17.436			0.800105	1.59651	0.659777	0.635204	3.52741			0.722125	0.179059	0.540871	0.847277	0.313981			2.43517	1.67749	4.08451	6.84246	8.22446			2.67	2.06166	7.52401	2.09751	7.75214			1.21335	0.952275	0.880749	1.37485	3.87885
		0.370598	0.53001	0.653763	1.61546	1.42346			4.53662	22.3921	20.6867	21.5512	17.3372			0.48242	1.73839	1.07078	1.14463	3.10096			0.559124	0.157941	0.571558	0.834542	0.148182			1.4019	3.42988	4.74554	6.36277	8.34297			0.26686	3.75769	1.28758	2.29895	4.74995			0.30199	0.702749	1.21075	1.87335	3.42831
		0.305334	0.372327	0.940915	1.54595	1.65415			4.78587	19.6731	21.0094	20.387	17.1601			0.87445	1.77412	0.883978	2.16785	2.72175			0.812177	0.237049	0.45167	0.645167	5.11334			1.20196	1.65487	4.06237	6.0274	7.46515			2.91146	3.76578	1.12991	1.80932	8.86051			0.71835	0.894293	0.382778	1.21795	2.62792
		0.332457	0.596683	1.13183	1.5131	1.50867			3.18377	17.5197	20.5751	15.5935	16.899			0.53467	0.999495	1.64044	3.65618	3.53851			0.630302	0.271025	0.761808	0.984147	0.326048			1.35862	2.03261	4.41941	5.56043	8.75162			2.7054	2.10432	1.55416	2.19052	8.8579			0.638885	0.947754	1.23045	0.787551	3.19746
		0.29873	0.688397	1.47746	1.57459	1.6077			5.30202	18.5834	19.7118	15.5473	16.7907			0.674352	0.901326	0.88675	4.19541	3.06107			0.7614	2.25549	0.60625	0.300788	2.28753			1.62603	2.26357	3.95638	5.9909	8.14912			2.33955	2.8831	1.76207	2.50991	7.76648			0.600572	0.836035	0.754181	0.803569	3.22002
		0.196441	0.683896	1.03387	1.90612	1.34741			5.51064	18.7727	12.9877	19.0347	16.24			0.778007	1.36872	0.925389	1.05502	1.02931			0.568439	1.25569	0.452163	0.78055	1.18967			1.80808	2.02012	4.72648	6.70507	7.56498			1.82078	2.167	1.34788	3.60224	14.1828			0.642957	2.00414	1.07397	1.23659	3.90938
		0.344209	0.723564	1.38453	1.69932	1.67155			4.83933	17.844	12.927	21.2961	16.1661			0.559743	1.36515	1.03976	0.716108	1.1507			0.634564	0.257489	0.450477	0.447743	1.43148			1.3566	2.16869	4.62445	6.31706	8.76908			2.63923	2.39944	1.14518	2.20802	7.58115			0.648367	0.997266	1.40011	1.48176	3.746
		0.44422	0.822773	1.34461	1.80465	1.0394			7.23202	16.5488	22.7519	21.1656	16.0095			0.398703	1.10695	1.22825	1.30461	1.33599			0.431369	0.111782	0.607521	0.475684	2.06321			1.64016	2.6605	4.51876	5.8183	7.32868			2.52244	2.47233	2.57521	2.18205	11.9108			0.585752	0.113621	1.08006	1.10015	3.37605
		0.327002	0.539103	1.07369	1.93924	1.23346			3.14638	17.2504	15.0866	20.7297	15.8716			0.600668	0.993592	1.48905	0.97071	3.86237			0.595452	0.117662	0.54466	0.615038	0.281485			1.97226	1.80657	3.36742	4.36594	8.64046			2.40599	3.19518	6.55032	3.16398	10.4086			0.48778	1.40618	1.04669	1.42994	2.09734
		0.275369	0.530082	1.16637	1.40056	2.0362			11.3128	15.8994	15.5589	20.9631	15.7263			0.459163	1.22839	0.725808	1.0304	1.25315			0.487364	0.144221	0.614599	0.565905	3.20933			1.28665	1.98476	4.16345	4.92827	7.20125			2.80312	2.00447	1.17196	4.22076	9.62958			1.53623	0.820566	0.95319	1.85269	1.87613
		0.310581	0.643488	1.31103	1.44058	0.76737			9.12798	15.9422	15.4127	20.8319	31.0347			0.70643	1.57031	1.04932	1.56504	0.993203			0.569733	0.183261	0.681576	0.982194	0.953844			1.94311	1.94012	5.08849	5.34015	8.24405			1.66047	2.94885	2.1167	2.72359	7.25288			0.62885	0.720935	0.528557	0.825438	1.65757
		0.323135			1.443	1.26335			1.17016	16.0788	15.3193	20.6953	30.9853			0.853265		1.05987	1.15776	0.824391			0.511951	0.257308	0.618731	0.945869	1.24288			1.93924	2.35523	4.17597	5.722	8.10718			1.96505	2.98739	5.80915	7.15688	12.8523			0.961845	0.896474	0.584708	3.26427	1.85859
									9.36748	16.0312	15.1933	20.7305	30.8626			0.96353							0.465218	1.12294	0.636406	0.0465526	0.79124			2.0618	2.02085	4.82803	6.00132	8.69351			2.23621	2.0371	8.58828	3.16041	7.88552			1.05152	0.725672	0.349999	3.17368	1.65415
									8.22091	15.6949	15.0561	20.4563	30.7638												0.810806	0.663997				2.0942	2.13432	5.26126	5.95475	9.14512			2.17795	2.11526	3.64069		7.62288			1.07563	0.993138	0.854206	3.26624	1.4251
									2.34822	15.7212	20.2263	31.7594	32.5914
									6.19205	16.1536	20.1121	32.4403	33.1425
										15.2701	31.9498	32.1422	32.8922
