# Supplementary material for: Kin discrimination in social yeast is mediated by cell surface receptors of the Flo11 adhesin family
Source: eLife. 2020 Apr 14;9:e55587. doi: 10.7554/eLife.55587 (PMC7156268; doi:10.7554/eLife.55587)
Supplement: Supplementary file 1. [file elife-55587-supp1.docx]

**Supplementary File 1**

**Flo11-type A domain sequences used for phylogenetic analysis.**

| **Strain1** | **Accession number2,3** | **Protein sequence** | **Source or Reference** |
| --- | --- | --- | --- |
| S288c | P086402 | GCPNLDFNWHMDQQNIMQYTLDVTSVSWVQDNTYQITIHVKGKENIDLKYLWSLKIIGVTGPKGTVQLYGYNENTYLIDNPTDFTATFEVYATQDVNSCQVWMPNFQIQFEYLQGSAAQYASSWQWGTTSFDLSTGCNNYDNQGHSQTDFP | UniProtKB |
| 1278b | E9P9G22 | GCPNLDFNWHMNQQNIMQYTLDVTSVSWVQDNTYQITIHVKGEENIDLKYLSSLKIIGVTGPKDTVQLYGYDENTDWIDNPLVSRCDENTYLIDNPTDFTATFEVYATQDVNSCQVWMPNFQIQFEYLQGSAAEYACSWEWGTTSFYLSTGCDNYDNQGYSQTDFP | UniProtKB |
| YJM789 | A6ZVT82 | GCPNLDFNWHMNQQNIMQYTLDVTSVSWVQDNTYQITIHVKGEENIDLEYLSSLKIIGVTGPKDTVQLYGYNEDTYLIDNPLVSRCDEYTYLIDNPTDFTATFEVYATQDVNSCQVWMPNFQIQFEYLQDIAPEDECSWEWGTTSFTLSTGCDNYDNQGYSQTDFP | UniProtKB |
| K7 | 2WFU72 | GCPNLDFNWHMNQQNIMQYTLDVTSVSWVQDNTYQITIHVKGEENIDLKYLWSLKIIGVTGPKDTVQLYGYDEDTDWIDNPLVSRCDENTHLIDNPTDFTATFEVYATQDVNSCQVWMPNFQIQFEYLQGSAAEHACSWEWGTTSFYLSTGCDNYDNQGYSQTDFP | UniProtKB |
| RM11-1a | B3LTJ02 | GCPNLDFNWHMNQQTIMQYTLDVTSVSWVQDNTYQITIHVKGKENIDLNYLSSLKIIGVTGPKDTVQLYGCNENTYLIDNPTDFTATFEVYATQDVNSCQVWMPNFQIQFEYLQGSAAQYASSWKWGTTSFNLSTGCNNYDNQGHSQTDFP | UniProtKB |
| 133d | E9P8M02 | GCPNLDFNWHMNQQTIMQYTLDVTSVSWVQDNTYQITIHVKGKENIDLKYLRSLKIIGVTGPKGTVQLYGYNENTYLIDNPTDFTATFEVYATQDVNSCQVWMPNFQIQFEYLQGSAAQYASSWKWGTTSFYLSTGCNNYDNQGHSQTDFP | UniProtKB |
| Lalvin_EC1118 | C8ZAR82 | GCPNLDFNWHMNQQTIMQYTLDVTSVSWVQDNTYQITIHVKGKENIDLNYLSSLKIIGVTGPKDTVQLYGCNENTYLIDNPTDFTATFEVYATQDVNSCQVWMPNFQIQFEYLQGSAAQYASSWKWGTTSFNLSTGCNNYDNQGHSQTDFP | UniProtKB |
| FostersO | E7NPK42 | GCPNLDFNWHMNQQNIMQYTLDVTSVSWVQDNTYQITIHVKGEENIDLKYLSSLKIIGVTGPKDTVQLYGYDENTDWIXNPLVSRCDENTYLIDNPTDFTATFEVYATQDVNSCQVWMPNFQIQFEYLQGSAAEYACSWEWGTTSFYLSTGCDNYDNQGYSQTDFP | UniProtKB |
| AWRI796 | B5VKV52 | GCPNLDFNWHMNQQTIMQYTLDVTSVSWVQDNTYQITIHVKGKENIDLKYLWSLKIIGVTGPKGTVQLYGYNENTYLIDNPTDFTATFEVYATQDVNSCQVWMPNFQIQFEYLQGSAAQYASSWKWGTTSFDLSTGCNNYDNQGHSQTDFP | UniProtKB |
| P283 | W7RDJ22 | GCPNLDFNWHMNQQTIMQYTLDVTSVSWVQDNTYQITIHVKGKENIDLNYLSSLKIIGVTGPKDTVQLYGCNENTYLIDNPTDFTATFEVYATQDVNSCQVWMPNFQIQFEYLQGSAAQYASSWKWGTTSFNLSTGCNNYDNQGHSQTDFP | UniProtKB |
| SK1 |  | GCPNLDFNWHMDQQNIMEYTLDVTSVSWVQDNTYQITVHVKGKENIDLKYLWSLKIIGVTGPKGTVQLYGYNENTYLIDNPTDFTATFEVYATQDVNSCQVWMPNFQIQFEYLQGSAAQYASSWKWGTTSFDLSTRCNNYDNQGHSQTDFP | SGRP (Liti et al., 2009),  Sanger Institute |
| W303 |  | GCPNLDFNWHMDQQNIMQYTLDVTSVSWVQDNTYQITIHVKGKENIDLKYLWSLKIIGVTGPKGTVQLYGYNENTYLIDNPTDFTATFEVYATQDVNSCQVWMPNFQIQFEYLQGSAAQYASSWQWGTTSFDLSTGCNNYDNQGHSQTDFP | SGRP (Liti et al., 2009),  Sanger Institute |
| 322134S |  | GCPNLDFNWHMNQQNIMQYTLDVTSVSWVQDNTYQITIHVKGKENIDLKYLSSLKIIGVTGPKDTVQLYGYNENTYLIDNPLVSRCDENTYLIDNPTDFTATFEVYATQDVN | SGRP (Liti et al., 2009),  Sanger Institute |
| YS2 |  | GCPNLDFNWHMNQQNIMQYTLDVTSVSWVQDNTYQITIHVKGEENIDLKYLSSLKIIGVTGPKDTVQLYGYDENTDWIDNPLVSRCDENTYLIDNPTDFTATFEVYATQDVNS | SGRP (Liti et al., 2009),  Sanger Institute |
| YS9 |  | GCPNLDFNWHMNQQNIMQYTLDVTSVSWVQDNTYQITIHVKGEENIDLKYLSSLKIIGVTGPKDTVQLYGYDENTDWIDNPLVSRCDENTYLIDNPTDFTATFEVYATQDVNS | SGRP (Liti et al., 2009),  Sanger Institute |
| BC187 |  | GCPNLDFNWHMNQQTIMQYTLDVTSVSWVQDNTYQITIHVKGKENIDLNYLSSLKIIGVTGPKDTVQLYGYNENTYLIDNPTDFTATFEVYATQDVNSC | SGRP (Liti et al., 2009),  Sanger Institute |
| DBVPG1106 |  | GCPNLDFNWHMNQQTIMQYTLDVTSVSWVQDNTYQITIHVKGKENIDLKYLWSLKIIGVTGPKGTVQLYGYNENTYLIDNPTDFTATFEVYATQDVNSC | SGRP (Liti et al., 2009),  Sanger Institute |
| DBVPG6765 |  | GCPNLDFNWHMNQQTIMQYTLDVTSVSWVQDNTYQITIHVKGKENIDLNYLWSLKIIGVTGPKGTVQLHSYNENTYLIDNPTDFTATFEVYATQDVNSCQVWMPDFQIQFEYLQDSAAQYASSWKWGTTSFNLSTGCNNYDNQGHSQTDFP | SGRP (Liti et al., 2009),  Sanger Institute |
| DBVPG6040 |  | GCPNLDFNWHMNQQTIMQYTLDVTSVSWVQDNTYQITIHVKGKENIDLNYLSSLKIIGVTGPKDTVQLYGCNENTYLIDNPTDFTATFEVYATPDVNSCQVWMPNFQIQFEYLQDSAAQYASSWKWGTTSFALSTGCNNYDDQGYSQTDFP | SGRP (Liti et al., 2009),  Sanger Institute |
| DBVPG1788 |  | GCPNLDFNWHMNQQTIMQYTLDVTSVSWVQDNTYQITIHVKGKENIDLKYLWSLKIIGVTGPKGTVQLYGYNENTYLIDNPTDFTATFEVYATQDVNSCQVWMPNFQIQFEYLQGSAAQYASSWKWGTTSFDLSTGCNNYDNQGHSQTDFP | SGRP (Liti et al., 2009),  Sanger Institute |
| UWOPS03_461.4 |  | GCPNLDFNWHMNQQNIMQYTLDVTSVSWVQDNTYQITIHVKGKENIDLKYLWSLKIIGVTGPKGTVQLYGYNENTYLIDNPTDFTATFEVYATQDVNSCQVWMPNFQIQFEYLQGSAAQYASSWKWGTTSFDLSTGCNNYDNQGHSQTDFP | SGRP (Liti et al., 2009),  Sanger Institute |
| UWOPS05_217.3 |  | GCPNLDFNWHMNQQNIMQYTLDVTSVSWVQDNTYQITIHVKGKENIDLKYLWSLKIIGVTGPKGTVQLYGYNENTYLIDNPTDFTATFEVYATQDVNSCQVWMPNFQIQFEYLQGSAAQYASSWKWGTTSFDLSTGCNNYDNQGHSQTDFP | SGRP (Liti et al., 2009),  Sanger Institute |
| UWOPS05_227.2 |  | GCPNLDFNWHMNQQNIMQYTLDVTSVSWVQDNTYQITIHVKGKENIDLKYLWSLKIIGVTGPKGTVQLYGYNENTYLIDNPTDFTATFEVYATQDVNSCQVWMPNFQIQFEYLQGSAAQYASTWKWGTTSFDLSTGCNNYDNQGHSQTDFP | SGRP (Liti et al., 2009),  Sanger Institute |
| K11 |  | GCPNLDFNWHMNQQNIMQYTLDVTSVSWVQDNTYQITIHVKGEENIDLKYLSSLKIIGVTGPKDTVQLYGYHENTYLIDNPIDFVRCSENTHLIDNPTDFTATFEVYATQDVN | SGRP (Liti et al., 2009),  Sanger Institute |
| Y9 |  | GCPNLDFNWHMNQQNIMQYTLDVTSVSWVQDNTYQITIHVKGEENIDLKYLWSLKIIGVTGPKDTVQLYGYDEDTDWIDNPLVSRCDENTHLIDNPTDFTATFEVYA | SGRP (Liti et al., 2009),  Sanger Institute |
| Y12 |  | GCPNLDFNWHMNQQNIMQYTLDVTSVSWVQDNTYQITIHVKGEENIDLKYLWSLKIIGVTGPKDTVQLYGYDEDTDWIDNPLVSRCDENTHLIDNPTDFTATFEVYATQDVNS | SGRP (Liti et al., 2009),  Sanger Institute |
| YPS606 |  | GCPNLDFNWHMDQQNIMQYTLDVTSVSWVQDNTYQITIHVKGKENIDLKYLWSLKIIGVTGPKGTVQLYGYNENTYLIDNPTDFTATFEVYATQDVNSCQVWMPNFQIQFEYLQGSAAQYASSWKWGTTSFDLSTGCNNYDNQGHSQTDFP | SGRP (Liti et al., 2009),  Sanger Institute |
| YPS128 |  | GCPNLDFNWHMDQQNIMQYTLDVTSVSWVQDNTYQITIHVKGKENIDLKYLWSLKIIGVTGPKGTVQLYGYNENTYLIDNPTDFTATFEVYATQDVNSCQVWMPNFQIQFEYLQGSAAQYASSWKWGTTSFDLSTGCNNYDNQGHSQTDFP | SGRP (Liti et al., 2009),  Sanger Institute |
| NCYC110 |  | GCPNLDFNWHMDQQNIMEYTLDVTSVSWVQDNTYQITVHVKGKENIDLKYLWSLKIIGVTGPKGTVQLYGYNENTYLIDNPTDFTATFEVYATQDVNSCQVWMPNFQIQFEYLQGSAAQYASSWKWGTTSFDLSTGCNNYDNQGHSQTDFP | SGRP (Liti et al., 2009),  Sanger Institute |
| Y10 | PRJNA602013 | GCPNLDFNWHMNQQNIMQYTLDVTSVSWVQDNTYQITIHVKGEENIDLKYLWSLKIIGVTGPKDTVQLYGYDEDTDWIDNPLVSRCDENTHLIDNPTDFTATFEVYATQDVNSCQVWMPNFQIQFEYLQGSAAQYASSWKWGTTSFDLSTGCNNYDNQGHSQTDFP | NCBI |
| YJSH1 | PRJNA724033 | GCPNLDFNWHMNQQNIMQYTLDVTSVSWVQDNTYQITIHVKGEENIDLKYLSSLKIIGVTGPKDTVQLYGYHENTYLIDNPIDFVRCSENTHLIDNPTDFTATFEVYATQDVNSCQVWMPNFQIQFEYLQGSAAQYACSWEWGTTSFYLSTGCNNYDHQGHSQTDFP | NCBI |
| UC5 | PRJNA601973 | GCPNLDFNWHMNQQNIMQYTLDVTSVSWVQDNTYQITIHVKGEENIDLKYLWSLKIIGVTGPKDTVQLYGYDEDTDWIDNPLVSRCDENTHLIDNPTDFTATFEVYATQDVNSCQVWMPNFQIQFEYLQGSAAEHACSWEWGTTSFYLSTGCDNYDNQGYSQTDFP | NCBI |
| SIHA_74 | KX1891023 | GCPNLDFNWHMNQQTIMQYTLDVTSVSWVQDNTYQITIHVKGKENIDLNYLSSLKIIGVTGPKDTVQLYGCDENTYLIDNPTDFTATFEVYATQDVNSCQVWMPNFQIQFEYLQGSAAQYASSWKWGTTSFNLSTGCNNYDNQGHSQTDFP | This study |
| SIHA_Whitearome4 | KX1891033 | GCPNLDFNWHMDQQNIMQYTLDVTSVSWVQDNTYQITIHVKGKENIDLKYLWSLKIIGVTGPKGTVQLYGYNENTYLIDNPTDFTATFEVYATQDVNSCQVWMPNFQIQFEYLQGSAAQYASSWQWGTTSFDLSTGCNNYDNQGHSQTDFP | This study |
| Lalvin_R-HST4 | KX1891043 | GCPNLDFNWHMNQQTIMQYTLDVTSVSWVQDNTYQITIHVKGKENIDLKYLWSLKIIGVTGPKGTVQLYGYNENTYLIDNPTDFTATFEVYATQDVNSCQVWMPNFQIQFEYLQGSAAQYASSWKWGTTSFDLSTGCNNYDNQGHSQTDFP | This study |
| Uvaferm_SVG4 | KX1891053 | GCPNLDFNWHMNQQTIMQYTLDVTSVSWVQDNTYQITIHVKGKENIDLKYLWSLKIIGVTGPKGTVQLYGYNENTYLIDNPTDFTATFEVYATQDVNSCQVWMPNFQIQFEYLQGSAAQYASSWKWGTTSFDLSTGCNNYDNQGHSQTDFP | This study |
| Uvaferm_CEG4 | KX1891063 | GCPNLDFNWHMNQQTIMQYTLDVTSVSWVQDNTYQITIHVKGKENIDLNYLSSLKIIGVTGPKDTVQLYGCNENTYLIDNPTDFTATFEVYATQDVNSCQVWMPNFQIQFEYLQGSAAQYASSWKWGTTSFNLSTGCNNYDNQGHSQTDFP | This study |
| SSI24 | KX1891073 | GCPNLDFNWHMNQQNIMQYTLDVTSVSWVQDNTYQITIHVKGEENIDLKYLSSLKIIGVTGPKDTVQLYGYDENTDWIDNPLVSRCDENTYLIDNPTDFTATFEVYATQDVNSCQVWMPNFQIQFEYLQGSAAEYACSWEWGTTSFYLSTGCNNYDNQGHSQTDFP | This study |
| SSI64 | KX1891083 | GCPNLDFNWHMNQQNIMQYTLDVTSVSWVQDNTYQITIHVKGEENIDLKYLWSLKIIGVTGPKDTVQLYGYDEDTDWIDNPLVSRCDENTYLIDNPTDFTATFEVYATQDVNSCQVWMPNFQIQFEYLQGSAAEYACSWEWGTTSFYLSTGCDNYDNQGYSQTDFP | This study |
| YJM1284 | KX1891093 | GCPNLDFNWHMNQQNIMQYTLDVTSVSWVQDNTYQITIHVKGEENIDLEYLSSLKIIGVTGPKDTVQLYGYNEDTYLIDNPLVSRCDEYTYLIDNPTDFTATFEVYATQDVNSCQVWMPNFQIQFEYLQDIAPEDECSWEWGTTSFTLSTGCDNYDNQGYSQTDFP | This study |
| YJM2224 | KX1891103 | GCPNLDFNWHMNQQNIMQYTLDVTSVSWVQDNTYQITIHVKGKENIDLKYLWSLKIIGVTGPKGTVQLYGYNENTYLIDNPTDFTATFEVYATQDANSCQVWMPNFQIQFEYLQGSAAQYASTWTWGTTSFDLSTGCNNYDNQGHSQTDFP | This study |
| YJM3084 | KX1891113 | GCPNLDFNWHMNQQNIMQYTLDVTSVSWVQDNTYQITIHVKGKENIDLKYLWSLKIIGVTGPKGTVQLYGYNENTYLIDNPTDFTATFEVYATQDVNSCQVWMPNFQIQFEYLQGSAAQYACSWEWGTTSFDLSTGCNNYDNQGHSQTDFP | This study |
| YJM3094 | KX1891123 | GCPNLDFNWHMNQQNIMQYTLDVTSVSWVQDNTYQITIHVKGEENIDLEYLSSLKIIGVTGPKDTVQLYGYNEDTYLIDNPLVSRCDEYTYLIDNPTDFTATFEVYATQDVNSCQVWMPNFQIQFEYLQDIAPEDECSWEWGTTSFTLSTGCDNYDNQGYSQTDFP | This study |
| YJM3114 | KX1891133 | GCPNLDFNWHMNQQNIMQYTLDVTSVSWVQDNTYQITIHVKGKENIDLKYLWSLKIIGVTGPKGTVQLYGYNENTYLIDNPTDFTATFEVYATQDVNSCQVWMPNFQIQFEYLQGSAAQYASSWKWGTTSFDLSTGCNNYDNQGHSQTDFP | This study |
| YJM3124 | KX1891143 | GCPNLDFNWHMNQQNIMQYTLDVTSVSWVQDNTYQITIHVKGEENIDLKYLWSLKIIGVTGPKDTVQLYGYDEDTDWIDNPLVSRCDENTHLIDNPTDFTATFEVYATQDVNSCQVWMPNFQIQFEYLQGSAAQYASSWQWGTTSFDLSTGCNNYDNQGHSQTDFP | This study |
| SSI34 | KX1891153 | GCPNLDFNWHMNQQNIMQYTLDVTSVSWVQDNTYQITIHVKGKENIDLKYLWSLKIIGVTGPKGTVQLYGYNENTYLIDNPTDFTATFEVYATQDVNSCQVWMPNFQIQFEYLQGSAAQYASSWKWGTTSFDLSTGCNNYDNQGHSQTDFP | This study |
| SSI44 | KX1891163 | GCPNLDFNWHMNQQSIMQYTLDVISVSWVQDDTYQITIHVEGKENIDLNYLSSLKIIDVTGPEDTVQLYGCNEEDTYLIDNPTDFTATFEVYATQDVNSGQVWMSDFQIQFEYLQDSAAQYASSWEWGATSFGLSTGCNNYDDQGHSQTDFP | This study |
| SSI94 | KX1891173 | GCSNLDFNWHMNQQNIMQYTLDVTSVSWVQDNTYQITIHVKGEENIDLNYLSSLKIIGVTGPKDTVQLYGYDENTYLIDNPLVSRYDENTYLIDNPTDFTATFEVYATQDVNSCQVWMPDFQIQFEYLQDSAAQYASSWEWGTTSFTLSTGCDNYDDQGYSQTDFP | This study |
| A64 | KX1891183 | GCPNLDFNWHMNQQNIMQYTLDVTSVSWVQDNTYLITIHVKGKENIDLNYLSSLKIIGLTGPEDTVQLYGCNEYTYLIDNPTDFTATFEVYATPDVNSCQVWMPDFQIQFEYLQDSAAQYASSWKWGTTSFTLSTGCNNYDSQGHSQTDFP | This study |
| A184 | KX1891193 | GCPNLDFNWHMNQQNIMQYTLDVTSVSWVQYNTYQITIHVKGKENIDLKYLSSLKIIGLTGPKDTVQLYGCNENTYLIDNPTDFTATFEVYATQDVNSCQVWMPNFQIQFKYLQGRAAQYASSWKWGTTSFDLSTGCNNYDNQGHSLTDFP | This study |
| KVL0124 | KX1891203 | GCPNLDFNWHMNQQTIMQYTLDVTSVSWVQDNTYQITIHVKGKENIDLKYLWSLKIIGVTGPKGTVQLYGYNENTYLIDNPTDFTATFEVYATQDVNSCQVWMPDFQIQFEYLQDSAAQYASSWKWGTTSFALSTGCNNYDNQGHSQTDFP | This study |
| C14 | KX1891213 | GCPNLDFNWHMNQQNIMQYTLDVTSVSWVQYNTYQITIHVKGKENIDLKYLSSLKIIGLTGPKDTVQLYGCNENTYLIDNPTDFTATFEVYATQDVNSCQVWMPNFQIQFKYLQGRAAQYASSWKWGTTSFDLSTGCNNYDSQGHSQTDFP | This study |
| *S. paradoxus*  CBS432 |  | GCPNLDFNWHMDQQNIMEYTLDVTSVSWVQDNTYQITIHVKGKENIDLKYLWSLKVIGVTGPKGTVQLYGTNENTYLIDNPTDFTATFEVYATQDVNSCQVWMPNFQIQFEYLQGTAAQYASTWKWGTTSFDLSTGCNNYDNQGHSQTDFP | SGRP (Liti et al., 2009),  Sanger Institute |
| *S. kudriavzevii*  IFO1802 | PRJNA14423 | GCPSLDFNWHMNQQNIMQYTLDVTSVSWVQDNTYQIQIHVKGKENIDLKYLWSLKVIGVNGPKGTVQLYGFNENTFLIDNPTDFTATFEVYATQDVNSCQVWMPNFQIQFEYLQGSAAQYSSTWEWGTTSFDLSTGCNNYDNQGHSQTDFP | NCBI |
| *S. bayanus*  MCYC623 | PRJNA14433 | GCPSLNFNWHMDQQNIMEYTLDVTSVSWVQDNTYQIQIHVKGKENIDLKYLWSLKVIGVTGPQGTVQLYGTNENTYLIDNPTDFTATFEVYATQDVNSCQVWMPNFQIQFEYLQGTAAQYASTWEWGTTSFDLSTGCNNYDNQGHSQTDFP | NCBI |
| *S. mikatae*  IFO1815T | PRJNA3743 | GCPSLDFNWHMNQQNIMQYTLDVTSVSWVRDNTYQIQIHVKGKENIDLKYLWSLKVIGVNGPKGTVQLYGHNENTYLIDNPTDFTATFEVYATQDVDSCQVWMPNFQIQFEYLQGSAAQYASSGKWGTTSFDLSTGSNNYDNQGHSQTDFP | NCBI |
| *S. arboricolus* | PRJNA885333 | GCPSLNFDWHMDQQNIMEYTLDVTSVSWVQDNTYQIQIHVKGKETIDIKYLWSLKVIGVSGPQGTVQLYGHNENVYLIDNPTDFTATFEVYATQDVNSCQVWMPNFQIQFEYLEGSTAQYSSTWKWGKSAFDLSTGCNNYDNQGHSQTDFP | NCBI |
| *K. pastoris* | C4R2D7_A2 | CYANQWETTFPPSDIKITGATWVQDNIYDVTLSYEAESLELENLTELKIIGLNSPTGGTKLVWSLNSKVYDIDNPAKWTTTLRVYTKSSADDCYVEMYPFQIQVDWCEAGASTDGCSAWKWPKSYDYDIGCDNMQDGVSRKHHP | UniProtKB |
| *K. pastoris* | C4R2D7_B2 | CYADQWETTFPPSDIKITGATWVEDNIYDVTLSYEAESLELENLTELKIIGLNSPTGGTKVVWSLNSGIYDIDNPAKWTTTLRVYTKSSADDCYVEMYPFQIQVDWCEAGASTDGCSAWKWPKSYDYDIGCDNMQDGVSRKHHP | UniProtKB |
| *C. lusitaniae* | C4XZ24_A2 | ACPNQKFTFHAQVVNFPQATITVTDPSDNGDGTWDVTINFNADATMSLKSLSELKILSLSKTYFLYSYNLKVDNINNPGSWSQRVTVTPRSVGDYKTCMPQFTIQYDWCSAGVTDWSECQNWKYQGSYDYITGCDNFDQSTGFSQKDAP | UniProtKB |
| *C. lusitaniae* | C4XZ24_B2 | ACPNQKFTFHAQVVNFPQATITVTDPSDNGDGTWDVTINFNAVATMSLKSLSELKILSLSKTYFLYSYNLKVDNINNPGSWSQRVTVTPRSVGNYKTCMPQFTIQFDWCSAGVTDQSECQNWKYQGSYDYITGCDNFDQSTGFSQKDAP | UniProtKB |
| *C. lusitaniae* | C4XZ24_C2 | ACPNQKFTFHAQVVNFPQATITVTDPSDNGDGTWDVTINFNAVATMSLKSLSELKILSLSKTYFLYSYNLKVDNINNPGSWSQRVTVTPRSVGNYKTCMPQFTIQYDWCSAGVTDWSECQNWKYQGSYDYITGCDNFDQSTGFSQKDAP | UniProtKB |
| *K. lactis* | Q6CPZ4_A2 | GCPCLDFSFRSQNTRTMPYNIELENVKWVESNIYTVTLHVTGQKQIPLKSLWSLKIIGVNSPDGSTFQLFGYNEKTYLIDNPTDWTATFRVYGQADSNDPSIVWMPTFQIQYEYCQGSADCSDWSYGTTTFDLITGCNNYDNYKRSQTDAG | UniProtKB |
| *K. lactis* | Q6CPZ4_B2 | GCPCLDFSFHSQNTGTMQYSIVPEEVNWVQDNIYTVTLHVTGQKQIPLKSLWSLKIIGVNSPDGSTFQLFGYNEKTYLIDNPTDWTATFRVYGQADSNDPSIVWMPTFQIQYEYCQGSADCSDWSYGTTTFDLITGCNNYDNYKRSQTDAG | UniProtKB |
| *S. passalidarum* | G3AVC2_A2 | ICDSPFGALSKANNQPELKIFEFKSIKWIEDNFYEVMIEFEIDGNSYTESELRAIYIFSLQTPDYYLGSVELFVESWEQNLLGDSPFHFYFTWVMEAEDIDQLTCTTPFQVYYDWDTYFATYQHGCFSDELTDLPAQCWDKPNFAETSSQQNLETSSQQNLE | UniProtKB |
| *S. passalidarum* | G3AVC2_B2 | IPIGAHALSESTYPKVKTFNFESIKFIQDDLYEVTLEFEIEDTIPKSELHAVFAYYLQTPDDYLSSIQLDAYVGNSPYHFYLVWIMKTQNIDQYICTTPFTIEYNWNGIPFSYTHGCL | UniProtKB |
| *T. delbrueckii* | G8ZQZ32 | ACPGLDFKWRSTYYGIMNYDMNVIGVNYLGKDSYEVTIHVVGDKQIPLKFLYSLSISNIGGPDRIVPLHHCDKGINKIDNPTDFTATFVVNSRPDLFGRVWMPDFKLDFEYVLGPARQYAKEWKWGKTSFSLASGCDLADFWGRSYADFP | UniProtKB |
| *M. guilliermondii* | A5DGW92 | AGLLQQRATQQPPKAVFQVSAVAHVEANLFKVTLDFETAASAQLFQSFANSAKSAKVTGLGSDLQSDAVVVGADASTGIDNLFAFSVSVLIEASIHNGLFCLPDGLAIELDLDLDVNTDVGKLWQEYFPQNIKYALDQNFQDAKQFTPSKRQD | UniProtKB |

1For *S. cerevisiae* strains, only names are shown.

2UniProt KnowledgeBase (UniProtKB) identification number followed by relative position of Flo11-type domain (A, B or C) for proteins with multiple Flo11A domains.

3GenBank database Gene, Genome or BioProject identification number (www.ncbi.nlm.nih.gov).

4Strains were described (Liti et al., 2009, Klingberg et al., 2008) and used in the current study for isolation and sequencing of *FLO11A* encoding DNA fragments.

**References**

KLINGBERG, T. D., LESNIK, U., ARNEBORG, N., RASPOR, P. & JESPERSEN, L. 2008. Comparison of *Saccharomyces cerevisiae* strains of clinical and nonclinical origin by molecular typing and determination of putative virulence traits. *FEMS Yeast Res,* 8**,** 631-40.

LITI, G., CARTER, D. M., MOSES, A. M., WARRINGER, J., PARTS, L., JAMES, S. A., DAVEY, R. P., ROBERTS, I. N., BURT, A., KOUFOPANOU, V., TSAI, I. J., BERGMAN, C. M., BENSASSON, D., O'KELLY, M. J., VAN OUDENAARDEN, A., BARTON, D. B., BAILES, E., NGUYEN, A. N., JONES, M., QUAIL, M. A., GOODHEAD, I., SIMS, S., SMITH, F., BLOMBERG, A., DURBIN, R. & LOUIS, E. J. 2009. Population genomics of domestic and wild yeasts. *Nature,* 458**,** 337-41.
